# Supplementary material for: Endosomal dysfunction contributes to cerebellar deficits in spinocerebellar ataxia type 6
Source: eLife. 2023 Dec 12;12:RP90510. doi: 10.7554/eLife.90510 (PMC10715727; doi:10.7554/eLife.90510)
Supplement: Figure 1—source data 1. [file elife-90510-fig1-data1.xlsx]

## Sheet: Normalized reads
Normalized read counts	Genotype	WT	WT	WT	WT	WT	SCA6	SCA6	SCA6	SCA6	SCA6
	Sex	M	F	M	F	F	M	M	M	F	F
	Sample ID	SCA6_1	SCA6_2	SCA6_3	SCA6_4	SCA6_5	SCA6_6	SCA6_7	SCA6_8	SCA6_9	SCA6_10
		8178.35	7845.79	8186.37	7535.32	7551.02	6904.68	7449.21	7175.76	6554.61	7176.68
		1281.66	1004.96	1198.77	1193.71	1298.35	1535.16	1589.71	1237.72	1415.15	1544.01
		513.794	462.156	463.078	322.623	670.028	889.811	706.31	704.083	1091.88	865.301
		33.8765	15.5086	56.7034	17.372	29.1921	66.0284	88.5462	66.9589	93.2253	104.416
		264204	233523	267923	263606	285069	336320	277098	312210	383074	326162
		25555.6	25305.3	24727	24324.1	24596.4	23414.9	22377.5	22965.9	23926	22475.6
		3057.36	2786.89	2680.33	3169.98	3318.17	2042.16	2089.07	2326.31	2615	2360.97
		96309.5	80222.8	90875.2	88276.3	98819.4	106950	94954.5	99068.7	122199	106585
		347.234	390.816	386.746	269.68	368.376	555.739	559.077	456.538	393.022	446.669
		50.8148	72.8903	57.4304	49.6343	59.7743	90.396	110.168	91.3076	116.699	113.118
		16524.7	12971.4	16089.2	13883.6	16214.1	19399.8	17129.6	17559.5	20295.6	19154.6
		728.345	680.826	477.617	547.632	651.957	953.482	790.738	696.981	930.912	1152.45
		2007.18	1246.89	1708.37	2068.1	1427.63	2237.89	2866.43	2257.33	2141.5	2784.43
		3338.25	2613.19	3745.33	2977.23	3774.12	4015.16	4000.02	3529.55	4381.59	4343.91
		73946.8	55813.8	60629	73223.9	69146.3	79005.3	73470.7	73974.4	90608.3	78716.3
		40.9341	12.4069	9.45057	27.2989	72.2852	68.3866	87.5166	84.2059	123.406	134.388
		1185.68	806.446	1528.81	1036.53	1594.44	1888.88	1775.04	1643.54	2061.02	2025.48
		29517.7	26879.5	29907.4	27657.1	33070.5	38886	34176.8	34674.6	43118.4	40681.7
		8198.12	7608.51	6434.38	7298.73	7399.5	10581.1	8866.98	9423.96	9383.56	8790.3
		20526.3	27946.5	23614.1	18450.7	19957.7	18033.6	18236.4	18425.9	16467.3	16382.7
		16384.9	13911.2	15620.3	14984.6	12558.2	11560.5	12278.1	13434.4	10839	13080.1
		129912	157063	136141	118298	128103	107217	101108	113336	103734	91760.6
		23338.1	26198.6	24133.1	21873.9	21905.2	19979.9	20305.9	21207.7	20405.6	19428.2
		4100.47	3287.82	4897.58	2841.57	4270.39	5754.69	5135.68	4461.9	5520.41	5548.56
		4744.12	4182.66	4292.01	4619.3	4699.93	5374.24	4964.76	4796.69	5873.87	5586.27
		38687	38572.9	41588.3	40725	41066.3	44908.7	44114.5	40463.5	46449.7	46310.5
		34582.3	38810.2	36925.6	38137.4	43119.5	59504.2	57705.4	58155.8	61763.5	67630.8
		731.168	776.98	1080.27	1200.32	1242.75	1397.6	1610.31	1280.34	1381.61	1743.17
		2711.53	2166.55	2629.44	2456.07	2664.82	2904.46	2999.25	2738.21	3025.46	3074.48
		2450.4	2439.5	2315.39	2292.28	2486.89	2747.25	2571.96	2710.82	2685.43	2889.82
		321.827	142.679	379.477	234.936	355.865	578.535	485.975	439.291	517.099	486.309
		7502.24	7275.07	6532.52	7119.22	7940.25	12245.9	9513.57	11704.6	9945.6	10071.3
		1551.26	1308.92	1081.73	1347.57	1415.12	2170.29	1978.9	2592.12	1808.84	1868.86
		454.51	454.401	344.582	552.596	590.792	661.07	821.626	1007.43	523.135	643.9
		348.646	376.858	251.531	331.723	407.299	601.33	546.721	785.245	409.789	557.853
		8606.05	9909.98	10736.6	10551.4	11600.4	13604.2	12612.7	12010	12731	13441.7
		709.995	531.944	624.465	586.513	619.984	934.616	858.692	892.785	969.141	830.496
		25942.4	27847.2	26386.7	26303.7	25887.8	23643.7	24651.9	24361.9	22728.9	23212.3
		7051.96	8546.78	7316.92	7301.21	7373.09	6411.04	6560.66	6638.06	6870.51	6496.04
		2498.39	2456.56	2098.75	2331.99	2645.36	3222.03	2807.74	2767.63	2866.51	2896.58
		2398.17	2400.73	3006.73	2585.12	2902.53	3560.03	3323.57	2922.86	3543.23	3470.87
		5201.46	5224.84	5530.76	4877.4	5082.2	6385.89	5971.72	5513.96	5831.61	6631.4
		24876.7	27800.7	26745.8	26198.7	26106.1	24373.9	24137.1	24586.1	24184.9	24203.3
		1421.4	1491.92	1690.92	1553.55	1504.09	1679.01	1757.54	1837.31	1970.47	1911.4
		1631.72	1484.17	1807.24	1391.42	1415.12	2175.79	2036.56	1787.6	2000.66	1800.21
		340.177	406.325	406.374	388.802	514.337	625.698	733.08	540.744	517.769	421.532
		4416.65	3573.18	5567.11	3557.96	5119.74	6363.88	6154.99	5750.35	7157.56	7187.32
		5280.5	5106.97	5161.46	5123.92	5568.74	5835.65	5622.68	5864.99	6071.05	6147.02
		13180.8	11212.7	12312.6	11947.8	13314.4	14990.8	13408.6	13936.6	15987.1	15470
		941.485	1105.76	1262.01	1126.7	1185.75	1385.81	1474.4	1245.84	1248.15	1498.57
		117134	139617	126935	120354	132128	114237	101086	121405	114217	97419.4
		16452.7	10795.5	17090.3	15131.9	15790.1	19255.9	19469.9	17063.4	19930.8	21052.4
		67143.2	74639.7	71541.5	65678.6	64899.6	60883.7	63645.2	60625.2	60024.4	61397.7
		1192.74	1411.28	1526.63	1158.96	1385.93	1704.95	1685.47	1658.75	1509.71	1691.93
		917.489	730.454	745.868	665.1	781.236	1137.42	987.393	860.32	855.795	974.552
		18571.4	15378.3	16883.8	16417.4	14685	14624.5	12572.5	13699.2	14331.9	14140.7
		4770.94	5412.49	7061.03	5541.67	5984.38	7370.81	8046.38	6448.34	6291.7	7546.97
		13338.9	14430.7	13457.6	13277.2	13296.3	12174.4	12712.6	12644.1	12252.1	11498.4
		39.5226	7.75429	73.4237	14.8903	70.8951	102.973	81.339	99.4238	104.627	154.691
		626.715	542.8	676.806	636.147	639.446	797.057	804.123	864.378	720.987	713.511
		13271.1	12520.1	13085.4	14461.8	13916.3	14813.2	14748.1	14949.1	16868.4	14859
		4257.15	4728.56	4409.05	4179.21	4287.07	3989.22	3872.35	3941.44	3619.02	3862.43
		28199.4	34978	28484	28583.6	32642.3	26070.2	23833.3	28011.1	28314.3	22981.2
		9181.95	9483.49	8565.12	8496.57	8586.64	8082.19	8331.58	8075.65	7688.74	7863.12
		15511.2	15544.2	15754.1	16409.1	16318.4	9038.82	9086.28	9246.41	9834.27	9189.6
		976.773	871.582	984.313	1110.98	1056.48	1255.33	1116.09	1252.94	1096.57	1257.83
		321.827	271.4	268.251	264.717	348.915	444.12	398.458	353.056	418.508	421.532
		359228	394242	351537	350034	348312	297951	306186	331243	328849	279026
		9743.73	10727.3	10435.6	9565.37	9973.96	9422.41	9278.82	9171.34	8683.37	8624.01
		2793.4	2799.3	2621.44	2689.35	2862.21	2496.5	2196.15	2357.76	2573.42	2375.47
		17748.5	17962	16057.2	16128.7	17270.6	14919.3	13362.2	15346.8	16079	14440.4
		71873.3	78864.2	74559.2	67756.7	67090.4	60671.5	63420.7	63559.2	58168.6	60722.9
		40.9341	31.0172	42.1641	45.4981	23.6317	69.9587	60.7468	100.438	59.0203	111.184
		1451.04	1316.68	1664.75	1391.42	2110.17	2263.83	1937.72	1794.7	2514.4	2280.72
		17141.5	19120.5	16422.2	17768.3	18228.4	16136.9	15604.7	16405.9	15914	15820
		1414.34	702.538	1160.24	1021.64	1202.44	1535.16	1448.66	1231.64	1782.01	1626.19
		1743.23	1234.48	1586.97	1784.35	1573.59	2050.02	1905.8	1735.86	2098.58	2053.52
		2216.09	1767.98	2164.91	2534.66	2054.57	1701.8	1639.13	1681.07	1794.76	1930.73
		1657.13	1566.37	1412.5	1541.97	1691.75	2091.69	1893.45	1679.04	1908.1	1887.23
		3435.64	2859.78	3685.72	2615.73	3230.59	4809.07	3979.43	4110.87	4356.77	4055.8
		69571.1	92623.4	82989.8	67729.4	76334.5	66406.5	65719.8	71471.5	62045.8	58665.5
		2069.29	1978.89	1831.23	1985.37	1998.96	2325.93	2166.29	2149.79	2272.28	2325.19

## Sheet: Endolysosomal genes
Gene Name	Gene ID	Base Mean	Log2 Fold Change	Adjusted P value
2610002M06Rik	ENSMUSG00000031242	7455.78	-0.156782	0.0383875
Ackr3	ENSMUSG00000044337	1329.92	0.292113	0.0321895
Ackr4	ENSMUSG00000079355	668.906	0.812718	0.000262022
Acp5	ENSMUSG00000001348	57.1828	1.43441	0.00362353
Apoe	ENSMUSG00000002985	294919	0.314852	0.00333071
Arl8a	ENSMUSG00000026426	23966.8	-0.112323	0.0398347
Borcs8	ENSMUSG00000002345	2644.62	-0.392163	0.000351821
Bsg	ENSMUSG00000023175	98426	0.221064	0.0479669
Ccr5	ENSMUSG00000079227	417.39	0.453634	0.0304797
Cd22	ENSMUSG00000030577	81.2233	0.855675	0.00349544
Cd63	ENSMUSG00000025351	16922.2	0.305645	0.00330072
Cd68	ENSMUSG00000018774	761.094	0.556621	0.00617456
Cpne6	ENSMUSG00000022212	2074.58	0.53706	0.00297403
Cpq	ENSMUSG00000039007	3671.84	0.301087	0.0432167
Cst3	ENSMUSG00000027447	72853.5	0.25021	0.0459657
Cst7	ENSMUSG00000068129	66.0278	1.63429	0.0100059
Ctsc	ENSMUSG00000030560	1554.59	0.609801	0.00259652
Ctsd	ENSMUSG00000007891	33857	0.381564	6.6854e-05
Ctss	ENSMUSG00000038642	8398.51	0.349678	0.000139191
Dagla	ENSMUSG00000035735	19804.1	-0.33579	0.0122535
Dgkh	ENSMUSG00000034731	13465.1	-0.263914	0.0216437
Dner	ENSMUSG00000036766	118667	-0.372494	0.000125876
Ece1	ENSMUSG00000057530	21877.6	-0.212895	0.0068996
Epn3	ENSMUSG00000010080	4581.91	0.445727	0.00905748
Fcgrt	ENSMUSG00000003420	4913.39	0.239352	0.0128752
Gaa	ENSMUSG00000025579	42288.6	0.147504	0.0464566
Gfap	ENSMUSG00000020932	49633.4	0.669808	5.4522e-22
Gfra1	ENSMUSG00000025089	1244.45	0.556566	0.00556931
Grb14	ENSMUSG00000026888	2737.03	0.222741	0.0303472
Gusb	ENSMUSG00000025534	2558.97	0.184801	0.0169741
H2-Ab1	ENSMUSG00000073421	394.199	0.802072	0.00465833
H2-K1	ENSMUSG00000061232	8985.03	0.556768	5.09194e-10
H2-Q4	ENSMUSG00000035929	1712.36	0.637397	3.63762e-06
H2-Q6	ENSMUSG00000073409	605.404	0.609669	0.0173079
H2-Q7	ENSMUSG00000060550	461.7	0.761106	0.000804605
Hexb	ENSMUSG00000021665	11580.4	0.324963	0.000832676
Ifi30	ENSMUSG00000031838	755.863	0.546827	8.20055e-07
Inpp5f	ENSMUSG00000042105	25096.6	-0.158494	0.00465833
Kcnj11	ENSMUSG00000096146	7056.63	-0.188306	0.0253024
Laptm5	ENSMUSG00000028581	2659.15	0.27762	0.00617456
Lipa	ENSMUSG00000024781	3011.39	0.338705	0.00259652
Man2b2	ENSMUSG00000029119	5625.12	0.226993	0.00833163
Map2k1	ENSMUSG00000004936	25321.3	-0.116782	0.0463305
Meak7	ENSMUSG00000034105	1681.76	0.254707	0.0121218
Mr1	ENSMUSG00000026471	1753.05	0.341738	0.00609953
Mrc1	ENSMUSG00000026712	489.484	0.465824	0.0447418
Myo7a	ENSMUSG00000030761	5484.87	0.552433	0.000243206
Naga	ENSMUSG00000022453	5578.3	0.171499	0.00859247
Npc2	ENSMUSG00000021242	13576.1	0.252145	0.00528456
Nrp1	ENSMUSG00000025810	1247.45	0.282935	0.042133
Nsg1	ENSMUSG00000029126	118453	-0.214247	0.0405702
Nsg2	ENSMUSG00000020297	17203.3	0.362505	0.0116027
Pacsin1	ENSMUSG00000040276	65047.9	-0.165753	0.0168121
Pld1	ENSMUSG00000027695	1492.63	0.30486	0.0131623
Pld4	ENSMUSG00000052160	865.562	0.328976	0.0462055
Prkcd	ENSMUSG00000021948	15130.5	-0.240201	0.0124299
Ptprf	ENSMUSG00000033295	6447.47	0.310759	0.0320966
Rab11a	ENSMUSG00000004771	12908.2	-0.145666	0.0281705
Rab38	ENSMUSG00000030559	74.9539	1.38724	0.0419438
Rassf9	ENSMUSG00000044921	702.197	0.316231	0.0172165
Rnd2	ENSMUSG00000001313	14349.2	0.180818	0.0297621
Rnf128	ENSMUSG00000031438	4114.55	-0.180602	0.0162168
Rnf19b	ENSMUSG00000028793	28209.8	-0.242567	0.0381324
Rusc1	ENSMUSG00000041263	8435.51	-0.145759	0.0439715
Scoc	ENSMUSG00000063253	12593.2	-0.777562	3.28221e-76
Sh3gl3	ENSMUSG00000030638	1097.89	0.255081	0.0455326
Slc11a1	ENSMUSG00000026177	351.078	0.471883	0.00568453
Snap25	ENSMUSG00000027273	334661	-0.224693	0.00541645
Spns2	ENSMUSG00000040447	9562.59	-0.158972	0.0291124
Stambpl1	ENSMUSG00000024776	2576.5	-0.195883	0.0227346
Syndig1	ENSMUSG00000074736	15931.5	-0.19943	0.0193641
Syt7	ENSMUSG00000024743	66668.6	-0.232483	0.00115854
Ticam2	ENSMUSG00000056130	58.4593	1.11041	0.00950622
Tinagl1	ENSMUSG00000028776	1872.54	0.44434	0.0134543
Tmem25	ENSMUSG00000002032	16856.2	-0.150397	0.0345055
Tpd52l1	ENSMUSG00000000296	1312.49	0.470735	0.0326255
Trip10	ENSMUSG00000019487	1776.64	0.312016	0.029048
Unc13d	ENSMUSG00000057948	1948.57	-0.297507	0.0246745
Unc93b1	ENSMUSG00000036908	1732.92	0.268183	0.0137483
Vcam1	ENSMUSG00000027962	3713.94	0.429248	0.00031666
Washc2	ENSMUSG00000024104	71355.7	-0.263302	0.0326236
Zfyve21	ENSMUSG00000021286	2110.32	0.190588	0.0206935
